# Supplementary material
Source: Springer Nature journal article supplement (https://www.springermedizin.de/resource/supplementary/12936_2013_2671_MOESM13_ESM.pdf/9545084)

Probability of hut entry

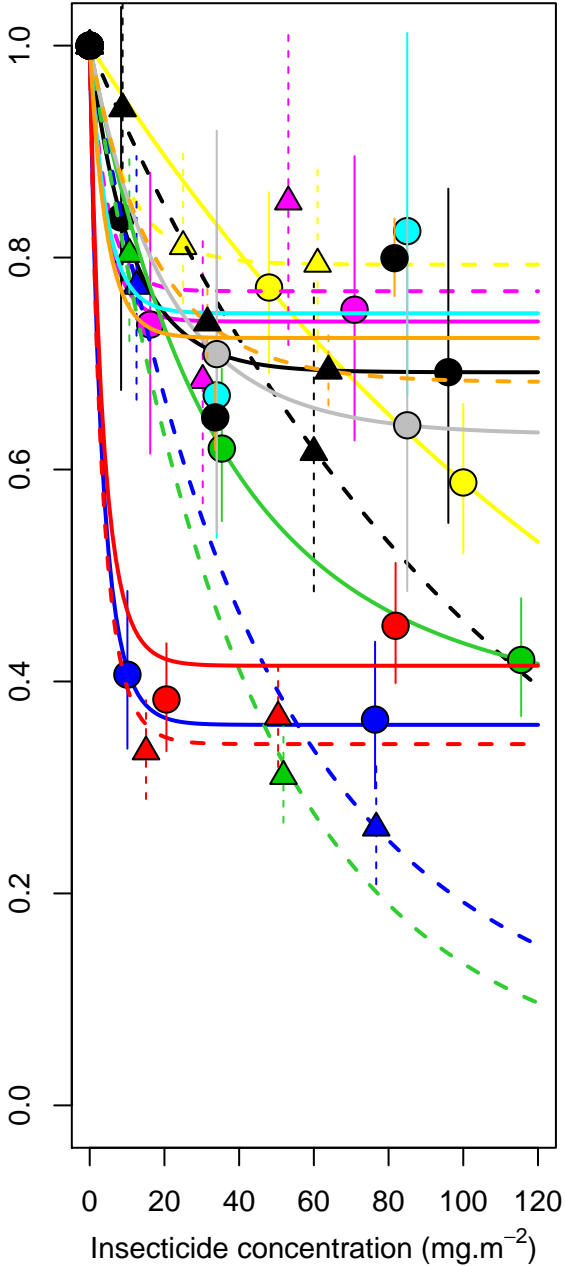

Supplement: MOESM13 [file 9545084]
